# Supplementary material for: Omega-3 fatty acids correlate with gut microbiome diversity and production of N-carbamylglutamate in middle aged and elderly women
Source: PubMed Central journal article supplement (PMC5593975; doi:10.1038/s41598-017-10382-2), 2017-09-11
Supplement: 41598_2017_10382_MOESM1_ESM.pdf [file 41598_2017_10382_MOESM1_ESM.pdf]

**Omega-3 fatty acids correlate with gut microbiome diversity and production of N-carbamylglutamate in middle aged and elderly women**

Cristina Menni<sup>a</sup>, Jonas Zierer<sup>a</sup>, Tess Pallister<sup>a</sup>, Matthew A Jackson<sup>a</sup>, Tao Long<sup>b</sup>, Robert P Mohny<sup>c</sup>,  
Claire J Steves<sup>a</sup>, Tim D Spector<sup>a</sup>, Ana M Valdes<sup>a,d,e</sup>

<sup>a</sup> Department of Twin Research and Genetic Epidemiology, Kings College London, London, UK.

<sup>b</sup> Sanford Burnham Prebys, USA

<sup>c</sup> Metabolon Inc., Raleigh-Durham, NC 27709, USA.

<sup>d</sup> School of Medicine, Nottingham City Hospital, Hucknall Road, Nottingham, UK.

<sup>e</sup> NIHR Nottingham Biomedical Research Centre, Nottingham, UK.

**Corresponding author:** Dr Ana M Valdes

School of Medicine Clinical Sciences Building, Nottingham City Hospital, Hucknall Road, Nottingham,  
NG5 1PB, UK

Phone number: +44 (0)115 823 1954; Fax number: +44(0) 115 823 1757

email: [Ana.Valdes@nottingham.ac.uk](mailto:Ana.Valdes@nottingham.ac.uk)

**Supplementary Table 1. List of faecal metabolites significantly associated to DHA circulating levels (FDR<0.05)adjusting for age, BMI and family relatedness.**

| <b>Super Pathway</b> | <b>Sub pathway</b>                     | <b>Metabolite</b>               | <b>BETA</b> | <b>SE</b> | <b>P</b>              | <b>Q</b> |
|----------------------|----------------------------------------|---------------------------------|-------------|-----------|-----------------------|----------|
| <b>Lipid</b>         | Polyunsaturated Fatty Acid (n3 and n6) | eicosapentaenoate (EPA; 20:5n3) | 0.15        | 0.04      | $4.35 \times 10^{-5}$ | 0.01     |
| <b>Xenobiotics</b>   | Carbamylated aminoacid                 | N-carbamylglutamate             | 0.15        | 0.04      | $1.21 \times 10^{-4}$ | 0.02     |
| <b>Peptide</b>       | Dipeptide Derivative                   | anserine                        | 0.13        | 0.04      | $5.39 \times 10^{-4}$ | 0.04     |

**Supplementary Table 2. Associations between five measures of microbiome diversity and circulating levels of PUFA adjusting for age, BMI**

**fibre intake and family relatedness**

|                  | SHANNON DIVERSITY |      |       | CHAO1 |      |       | OBSERVED SPECIES |      |       | Phylogenetic Diversity |      |      | SIMPSON |      |      |
|------------------|-------------------|------|-------|-------|------|-------|------------------|------|-------|------------------------|------|------|---------|------|------|
|                  | Beta              | SE   | P     | Beta  | SE   | P     | Beta             | SE   | P     | Beta                   | SE   | P    | Beta    | SE   | P    |
| <b>DHA</b>       | 0.13              | 0.04 | 0.002 | 0.12  | 0.04 | 0.003 | 0.14             | 0.04 | 0.001 | 0.12                   | 0.04 | 0.01 | 0.09    | 0.04 | 0.02 |
| <b>FAW3</b>      | 0.12              | 0.04 | 0.005 | 0.13  | 0.04 | 0.003 | 0.13             | 0.04 | 0.002 | 0.12                   | 0.05 | 0.01 | 0.08    | 0.04 | 0.05 |
| <b>LA (18:2)</b> | 0.10              | 0.05 | 0.02  | 0.10  | 0.05 | 0.03  | 0.10             | 0.05 | 0.03  | 0.10                   | 0.05 | 0.03 | 0.09    | 0.04 | 0.04 |
| <b>FAW6</b>      | 0.09              | 0.04 | 0.02  | 0.10  | 0.04 | 0.01  | 0.10             | 0.04 | 0.01  | 0.10                   | 0.04 | 0.02 | 0.08    | 0.04 | 0.05 |

DHA=22:6 docosahexaenoic acid;; FAW3= Omega-3 fatty acids; 18:2, LA= linoleic acid;; FAW6=omega-6 fatty acids

**Supplementary Table 3. List of faecal metabolites measured using commercial metabolomic panel Metabolon Inc**

| <b>Super-pathway</b> | <b>Sub-pathway</b>                       | <b>Metabolite name</b>        |
|----------------------|------------------------------------------|-------------------------------|
| <b>Amino Acid</b>    | Alanine and Aspartate Metabolism         | 3-sulfo-L-alanine             |
| <b>Amino Acid</b>    | Alanine and Aspartate Metabolism         | alanine                       |
| <b>Amino Acid</b>    | Alanine and Aspartate Metabolism         | asparagine                    |
| <b>Amino Acid</b>    | Alanine and Aspartate Metabolism         | aspartate                     |
| <b>Amino Acid</b>    | Alanine and Aspartate Metabolism         | N-acetylalanine               |
| <b>Amino Acid</b>    | Alanine and Aspartate Metabolism         | N-acetylasparagine            |
| <b>Amino Acid</b>    | Alanine and Aspartate Metabolism         | N-acetylaspartate (NAA)       |
| <b>Amino Acid</b>    | Alanine and Aspartate Metabolism         | N-carbamoylalanine            |
| <b>Amino Acid</b>    | Alanine and Aspartate Metabolism         | N-methylalanine               |
| <b>Amino Acid</b>    | Creatine Metabolism                      | creatine                      |
| <b>Amino Acid</b>    | Creatine Metabolism                      | creatinine                    |
| <b>Amino Acid</b>    | Creatine Metabolism                      | N-carbamoylsarcosine          |
| <b>Amino Acid</b>    | Glutamate Metabolism                     | carboxyethyl-GABA             |
| <b>Amino Acid</b>    | Glutamate Metabolism                     | gamma-aminobutyrate (GABA)    |
| <b>Amino Acid</b>    | Glutamate Metabolism                     | glutamate                     |
| <b>Amino Acid</b>    | Glutamate Metabolism                     | glutamate, gamma-methyl ester |
| <b>Amino Acid</b>    | Glutamate Metabolism                     | glutamine                     |
| <b>Amino Acid</b>    | Glutamate Metabolism                     | N-acetylglutamate             |
| <b>Amino Acid</b>    | Glutamate Metabolism                     | N-acetylglutamine             |
| <b>Amino Acid</b>    | Glutamate Metabolism                     | N-methylglutamate             |
| <b>Amino Acid</b>    | Glutamate Metabolism                     | pyroglutamine*                |
| <b>Amino Acid</b>    | Glutamate Metabolism                     | S-1-pyrroline-5-carboxylate   |
| <b>Amino Acid</b>    | Glutathione Metabolism                   | 5-oxoproline                  |
| <b>Amino Acid</b>    | Glycine, Serine and Threonine Metabolism | allo-threonine                |
| <b>Amino Acid</b>    | Glycine, Serine and Threonine Metabolism | betaine                       |
| <b>Amino Acid</b>    | Glycine, Serine and Threonine Metabolism | dimethylglycine               |
| <b>Amino Acid</b>    | Glycine, Serine and Threonine Metabolism | glycine                       |
| <b>Amino Acid</b>    | Glycine, Serine and Threonine Metabolism | N-acetylglycine               |
| <b>Amino Acid</b>    | Glycine, Serine and Threonine Metabolism | N-acetyls erine               |
| <b>Amino Acid</b>    | Glycine, Serine and Threonine Metabolism | N-acetylthreonine             |
| <b>Amino Acid</b>    | Glycine, Serine and Threonine Metabolism | O-acetylhomoserine            |
| <b>Amino Acid</b>    | Glycine, Serine and Threonine Metabolism | serine                        |
| <b>Amino Acid</b>    | Glycine, Serine and Threonine Metabolism | threonine                     |
| <b>Amino Acid</b>    | Guanidino and Acetamido Metabolism       | 1-methylguanidine             |
| <b>Amino Acid</b>    | Guanidino and Acetamido Metabolism       | 4-guanidinobutanoate          |
| <b>Amino Acid</b>    | Histidine Metabolism                     | 1-methylimidazoleacetate      |
| <b>Amino Acid</b>    | Histidine Metabolism                     | 3-methylhistidine             |
| <b>Amino Acid</b>    | Histidine Metabolism                     | 4-imidazoleacetate            |
| <b>Amino Acid</b>    | Histidine Metabolism                     | cis-urocanate                 |
| <b>Amino Acid</b>    | Histidine Metabolism                     | formiminoglutamate            |
| <b>Amino Acid</b>    | Histidine Metabolism                     | histidine                     |
| <b>Amino Acid</b>    | Histidine Metabolism                     | imidazole lactate             |

|                   |                                                  |                                        |
|-------------------|--------------------------------------------------|----------------------------------------|
| <b>Amino Acid</b> | Histidine Metabolism                             | imidazole propionate                   |
| <b>Amino Acid</b> | Histidine Metabolism                             | N-acetylhistidine                      |
| <b>Amino Acid</b> | Histidine Metabolism                             | trans-urocanate                        |
| <b>Amino Acid</b> | Leucine, Isoleucine and Valine Metabolism        | 2,3-dimethylsuccinate                  |
| <b>Amino Acid</b> | Leucine, Isoleucine and Valine Metabolism        | 2-hydroxy-3-methylvalerate             |
| <b>Amino Acid</b> | Leucine, Isoleucine and Valine Metabolism        | 3-methyl-2-oxobutyrate                 |
| <b>Amino Acid</b> | Leucine, Isoleucine and Valine Metabolism        | 3-methyl-2-oxovalerate                 |
| <b>Amino Acid</b> | Leucine, Isoleucine and Valine Metabolism        | 4-methyl-2-oxopentanoate               |
| <b>Amino Acid</b> | Leucine, Isoleucine and Valine Metabolism        | alpha-hydroxyisocaproate               |
| <b>Amino Acid</b> | Leucine, Isoleucine and Valine Metabolism        | alpha-hydroxyisovalerate               |
| <b>Amino Acid</b> | Leucine, Isoleucine and Valine Metabolism        | ethylmalonate                          |
| <b>Amino Acid</b> | Leucine, Isoleucine and Valine Metabolism        | isoleucine                             |
| <b>Amino Acid</b> | Leucine, Isoleucine and Valine Metabolism        | isovalerate (C5)                       |
| <b>Amino Acid</b> | Leucine, Isoleucine and Valine Metabolism        | isovalerylglycine                      |
| <b>Amino Acid</b> | Leucine, Isoleucine and Valine Metabolism        | leucine                                |
| <b>Amino Acid</b> | Leucine, Isoleucine and Valine Metabolism        | methylsuccinate                        |
| <b>Amino Acid</b> | Leucine, Isoleucine and Valine Metabolism        | N-acetylisoleucine                     |
| <b>Amino Acid</b> | Leucine, Isoleucine and Valine Metabolism        | N-acetylleucine                        |
| <b>Amino Acid</b> | Leucine, Isoleucine and Valine Metabolism        | N-acetylvaline                         |
| <b>Amino Acid</b> | Leucine, Isoleucine and Valine Metabolism        | valine                                 |
| <b>Amino Acid</b> | Lysine Metabolism                                | 2-aminoadipate                         |
| <b>Amino Acid</b> | Lysine Metabolism                                | 5-aminovalerate                        |
| <b>Amino Acid</b> | Lysine Metabolism                                | 6-oxopiperidine-2-carboxylic acid      |
| <b>Amino Acid</b> | Lysine Metabolism                                | glutarate (pentanedioate)              |
| <b>Amino Acid</b> | Lysine Metabolism                                | lysine                                 |
| <b>Amino Acid</b> | Lysine Metabolism                                | N2,N6-diacetyllysine                   |
| <b>Amino Acid</b> | Lysine Metabolism                                | N2-acetyllysine                        |
| <b>Amino Acid</b> | Lysine Metabolism                                | N6,N6,N6-trimethyllysine               |
| <b>Amino Acid</b> | Lysine Metabolism                                | N6-acetyllysine                        |
| <b>Amino Acid</b> | Lysine Metabolism                                | N6-carboxyethyllysine                  |
| <b>Amino Acid</b> | Lysine Metabolism                                | N6-formyllysine                        |
| <b>Amino Acid</b> | Lysine Metabolism                                | N-acetyl-cadaverine                    |
| <b>Amino Acid</b> | Lysine Metabolism                                | pipecolate                             |
| <b>Amino Acid</b> | Lysine Metabolism                                | saccharopine                           |
| <b>Amino Acid</b> | Methionine, Cysteine, SAM and Taurine Metabolism | 2-aminobutyrate                        |
| <b>Amino Acid</b> | Methionine, Cysteine, SAM and Taurine Metabolism | 2-hydroxybutyrate/2-hydroxyisobutyrate |
| <b>Amino Acid</b> | Methionine, Cysteine, SAM and Taurine Metabolism | cysteine                               |
| <b>Amino Acid</b> | Methionine, Cysteine, SAM and Taurine Metabolism | cysteine s-sulfate                     |
| <b>Amino Acid</b> | Methionine, Cysteine, SAM and Taurine Metabolism | cysteine sulfinic acid                 |
| <b>Amino Acid</b> | Methionine, Cysteine, SAM and Taurine Metabolism | cystine                                |
| <b>Amino Acid</b> | Methionine, Cysteine, SAM and Taurine Metabolism | methionine                             |
| <b>Amino Acid</b> | Methionine, Cysteine, SAM and Taurine Metabolism | methionine sulfoxide                   |

|                   | Metabolism                                       |                                     |
|-------------------|--------------------------------------------------|-------------------------------------|
| <b>Amino Acid</b> | Methionine, Cysteine, SAM and Taurine Metabolism | N-acetylcysteine                    |
| <b>Amino Acid</b> | Methionine, Cysteine, SAM and Taurine Metabolism | N-acetylmethionine                  |
| <b>Amino Acid</b> | Methionine, Cysteine, SAM and Taurine Metabolism | N-acetylmethionine sulfoxide        |
| <b>Amino Acid</b> | Methionine, Cysteine, SAM and Taurine Metabolism | N-formylmethionine                  |
| <b>Amino Acid</b> | Methionine, Cysteine, SAM and Taurine Metabolism | taurine                             |
| <b>Amino Acid</b> | Phenylalanine and Tyrosine Metabolism            | (R)-salsolinol                      |
| <b>Amino Acid</b> | Phenylalanine and Tyrosine Metabolism            | 3-(3-hydroxyphenyl)propionate       |
| <b>Amino Acid</b> | Phenylalanine and Tyrosine Metabolism            | 3-(4-hydroxyphenyl)lactate (HPLA)   |
| <b>Amino Acid</b> | Phenylalanine and Tyrosine Metabolism            | 3-(4-hydroxyphenyl)propionate       |
| <b>Amino Acid</b> | Phenylalanine and Tyrosine Metabolism            | 3-phenylpropionate (hydrocinnamate) |
| <b>Amino Acid</b> | Phenylalanine and Tyrosine Metabolism            | 4-hydroxycinnamate                  |
| <b>Amino Acid</b> | Phenylalanine and Tyrosine Metabolism            | 4-hydroxyphenylacetate              |
| <b>Amino Acid</b> | Phenylalanine and Tyrosine Metabolism            | 4-hydroxyphenylpyruvate             |
| <b>Amino Acid</b> | Phenylalanine and Tyrosine Metabolism            | cis-4-hydroxycyclohexylacetic acid  |
| <b>Amino Acid</b> | Phenylalanine and Tyrosine Metabolism            | dihydrocaffeate                     |
| <b>Amino Acid</b> | Phenylalanine and Tyrosine Metabolism            | N-acetylphenylalanine               |
| <b>Amino Acid</b> | Phenylalanine and Tyrosine Metabolism            | N-acetyltyrosine                    |
| <b>Amino Acid</b> | Phenylalanine and Tyrosine Metabolism            | N-formylphenylalanine               |
| <b>Amino Acid</b> | Phenylalanine and Tyrosine Metabolism            | p-cresol                            |
| <b>Amino Acid</b> | Phenylalanine and Tyrosine Metabolism            | p-cresol sulfate                    |
| <b>Amino Acid</b> | Phenylalanine and Tyrosine Metabolism            | phenethylamine                      |
| <b>Amino Acid</b> | Phenylalanine and Tyrosine Metabolism            | phenylacetate                       |
| <b>Amino Acid</b> | Phenylalanine and Tyrosine Metabolism            | phenylalanine                       |
| <b>Amino Acid</b> | Phenylalanine and Tyrosine Metabolism            | phenyllactate (PLA)                 |
| <b>Amino Acid</b> | Phenylalanine and Tyrosine Metabolism            | phenylpyruvate                      |
| <b>Amino Acid</b> | Phenylalanine and Tyrosine Metabolism            | tyramine                            |
| <b>Amino Acid</b> | Phenylalanine and Tyrosine Metabolism            | tyrosine                            |
| <b>Amino Acid</b> | Phenylalanine and Tyrosine Metabolism            | valerylphenylalanine                |
| <b>Amino Acid</b> | Polyamine Metabolism                             | 4-acetamidobutanoate                |
| <b>Amino Acid</b> | Polyamine Metabolism                             | acisoga                             |
| <b>Amino Acid</b> | Polyamine Metabolism                             | N-acetylputrescine                  |
| <b>Amino Acid</b> | Polyamine Metabolism                             | spermidine                          |
| <b>Amino Acid</b> | Tryptophan Metabolism                            | 2-aminophenol                       |
| <b>Amino Acid</b> | Tryptophan Metabolism                            | indole-3-carboxylic acid            |
| <b>Amino Acid</b> | Tryptophan Metabolism                            | indoleacetate                       |
| <b>Amino Acid</b> | Tryptophan Metabolism                            | indolelactate                       |
| <b>Amino Acid</b> | Tryptophan Metabolism                            | indolepropionate                    |
| <b>Amino Acid</b> | Tryptophan Metabolism                            | kynurenate                          |
| <b>Amino Acid</b> | Tryptophan Metabolism                            | N-acetyltryptophan                  |
| <b>Amino Acid</b> | Tryptophan Metabolism                            | picolinate                          |
| <b>Amino Acid</b> | Tryptophan Metabolism                            | serotonin                           |

|                               |                                                      |                                         |
|-------------------------------|------------------------------------------------------|-----------------------------------------|
| <b>Amino Acid</b>             | Tryptophan Metabolism                                | thioprolin                              |
| <b>Amino Acid</b>             | Tryptophan Metabolism                                | tryptamin                               |
| <b>Amino Acid</b>             | Tryptophan Metabolism                                | tryptophan                              |
| <b>Amino Acid</b>             | Urea cycle; Arginine and Proline Metabolism          | arginin                                 |
| <b>Amino Acid</b>             | Urea cycle; Arginine and Proline Metabolism          | citrullin                               |
| <b>Amino Acid</b>             | Urea cycle; Arginine and Proline Metabolism          | dimethylarginin (ADMA + SDMA)           |
| <b>Amino Acid</b>             | Urea cycle; Arginine and Proline Metabolism          | homocitrullin                           |
| <b>Amino Acid</b>             | Urea cycle; Arginine and Proline Metabolism          | hydroxyprolin                           |
| <b>Amino Acid</b>             | Urea cycle; Arginine and Proline Metabolism          | N-acetylarginin                         |
| <b>Amino Acid</b>             | Urea cycle; Arginine and Proline Metabolism          | N-acetylcitrullin                       |
| <b>Amino Acid</b>             | Urea cycle; Arginine and Proline Metabolism          | N-acetylprolin                          |
| <b>Amino Acid</b>             | Urea cycle; Arginine and Proline Metabolism          | N-alpha-acetylornithin                  |
| <b>Amino Acid</b>             | Urea cycle; Arginine and Proline Metabolism          | N-delta-acetylornithin                  |
| <b>Amino Acid</b>             | Urea cycle; Arginine and Proline Metabolism          | N-methylprolin                          |
| <b>Amino Acid</b>             | Urea cycle; Arginine and Proline Metabolism          | ornithin                                |
| <b>Amino Acid</b>             | Urea cycle; Arginine and Proline Metabolism          | prolin                                  |
| <b>Carbohydrate</b>           | Advanced Glycation End-product                       | N6-carboxymethyllysine                  |
| <b>Carbohydrate</b>           | Aminosugar Metabolism                                | erythronat*                             |
| <b>Carbohydrate</b>           | Aminosugar Metabolism                                | glucuronat                              |
| <b>Carbohydrate</b>           | Aminosugar Metabolism                                | N-acetyl-beta-glucosaminylamin          |
| <b>Carbohydrate</b>           | Aminosugar Metabolism                                | N-acetylglucosamin/N-acetylgalactosamin |
| <b>Carbohydrate</b>           | Aminosugar Metabolism                                | N-acetylglucosaminylasparagin           |
| <b>Carbohydrate</b>           | Aminosugar Metabolism                                | N-acetylmuramat                         |
| <b>Carbohydrate</b>           | Aminosugar Metabolism                                | N-acetylneuraminat                      |
| <b>Carbohydrate</b>           | Fructose, Mannose and Galactose Metabolism           | fructose                                |
| <b>Carbohydrate</b>           | Fructose, Mannose and Galactose Metabolism           | galactonat                              |
| <b>Carbohydrate</b>           | Fructose, Mannose and Galactose Metabolism           | mannitol/sorbitol                       |
| <b>Carbohydrate</b>           | Fructose, Mannose and Galactose Metabolism           | mannose                                 |
| <b>Carbohydrate</b>           | Glycogen Metabolism                                  | maltose                                 |
| <b>Carbohydrate</b>           | Glycolysis, Gluconeogenesis, and Pyruvate Metabolism | glucose                                 |
| <b>Carbohydrate</b>           | Glycolysis, Gluconeogenesis, and Pyruvate Metabolism | glycerat                                |
| <b>Carbohydrate</b>           | Glycolysis, Gluconeogenesis, and Pyruvate Metabolism | lactat                                  |
| <b>Carbohydrate</b>           | Pentose Metabolism                                   | 2-deoxyribose                           |
| <b>Carbohydrate</b>           | Pentose Metabolism                                   | arabinose                               |
| <b>Carbohydrate</b>           | Pentose Metabolism                                   | arabitol/xylitol                        |
| <b>Carbohydrate</b>           | Pentose Metabolism                                   | arabonat/xylonat                        |
| <b>Carbohydrate</b>           | Pentose Metabolism                                   | fucose                                  |
| <b>Carbohydrate</b>           | Pentose Metabolism                                   | ribitol                                 |
| <b>Carbohydrate</b>           | Pentose Metabolism                                   | ribonat (ribonolacton)                  |
| <b>Carbohydrate</b>           | Pentose Metabolism                                   | ribulose/xylulose                       |
| <b>Carbohydrate</b>           | Pentose Metabolism                                   | sedoheptulose                           |
| <b>Carbohydrate</b>           | Pentose Metabolism                                   | xylose                                  |
| <b>Cofactors and Vitamins</b> | Ascorbate and Aldarate Metabolism                    | threonat                                |

|                               |                                        |                                     |
|-------------------------------|----------------------------------------|-------------------------------------|
| <b>Cofactors and Vitamins</b> | Biotin Metabolism                      | biocytin                            |
| <b>Cofactors and Vitamins</b> | Biotin Metabolism                      | biotin                              |
| <b>Cofactors and Vitamins</b> | Hemoglobin and Porphyrin Metabolism    | bilirubin                           |
| <b>Cofactors and Vitamins</b> | Hemoglobin and Porphyrin Metabolism    | biliverdin                          |
| <b>Cofactors and Vitamins</b> | Hemoglobin and Porphyrin Metabolism    | D-urobilin                          |
| <b>Cofactors and Vitamins</b> | Hemoglobin and Porphyrin Metabolism    | L-urobilin                          |
| <b>Cofactors and Vitamins</b> | Nicotinate and Nicotinamide Metabolism | 6-hydroxynicotinate                 |
| <b>Cofactors and Vitamins</b> | Nicotinate and Nicotinamide Metabolism | nicotinamide                        |
| <b>Cofactors and Vitamins</b> | Nicotinate and Nicotinamide Metabolism | nicotinamide riboside               |
| <b>Cofactors and Vitamins</b> | Nicotinate and Nicotinamide Metabolism | nicotinate                          |
| <b>Cofactors and Vitamins</b> | Nicotinate and Nicotinamide Metabolism | nicotinate ribonucleoside           |
| <b>Cofactors and Vitamins</b> | Nicotinate and Nicotinamide Metabolism | trigonelline (N'-methylnicotinate)  |
| <b>Cofactors and Vitamins</b> | Pantothenate and CoA Metabolism        | pantothenate (Vitamin B5)           |
| <b>Cofactors and Vitamins</b> | Pterin Metabolism                      | pterin                              |
| <b>Cofactors and Vitamins</b> | Riboflavin Metabolism                  | riboflavin (Vitamin B2)             |
| <b>Cofactors and Vitamins</b> | Thiamine Metabolism                    | 5-(2-Hydroxyethyl)-4-methylthiazole |
| <b>Cofactors and Vitamins</b> | Thiamine Metabolism                    | thiamin (Vitamin B1)                |
| <b>Cofactors and Vitamins</b> | Tocopherol Metabolism                  | alpha-tocopherol                    |
| <b>Cofactors and Vitamins</b> | Tocopherol Metabolism                  | alpha-tocotrienol                   |
| <b>Cofactors and Vitamins</b> | Tocopherol Metabolism                  | gamma-tocopherol/beta-tocopherol    |
| <b>Cofactors and Vitamins</b> | Tocopherol Metabolism                  | gamma-tocotrienol                   |
| <b>Cofactors and Vitamins</b> | Vitamin B6 Metabolism                  | pyridoxal                           |
| <b>Cofactors and Vitamins</b> | Vitamin B6 Metabolism                  | pyridoxamine                        |
| <b>Cofactors and Vitamins</b> | Vitamin B6 Metabolism                  | pyridoxate                          |
| <b>Cofactors and Vitamins</b> | Vitamin B6 Metabolism                  | pyridoxine (Vitamin B6)             |
| <b>Energy</b>                 | Oxidative Phosphorylation              | phosphate                           |
| <b>Energy</b>                 | TCA Cycle                              | 2-methylcitrate/homocitrate         |
| <b>Energy</b>                 | TCA Cycle                              | alpha-ketoglutarate                 |
| <b>Energy</b>                 | TCA Cycle                              | citrate                             |
| <b>Energy</b>                 | TCA Cycle                              | fumarate                            |

|               |                                              |                                               |
|---------------|----------------------------------------------|-----------------------------------------------|
| <b>Energy</b> | TCA Cycle                                    | malate                                        |
| <b>Energy</b> | TCA Cycle                                    | succinate                                     |
| <b>Energy</b> | TCA Cycle                                    | tricarballylate                               |
| <b>Lipid</b>  | Carnitine Metabolism                         | carnitine                                     |
| <b>Lipid</b>  | Carnitine Metabolism                         | deoxycarnitine                                |
| <b>Lipid</b>  | Diacylglycerol                               | 1-oleoyl-3-linoleoyl-glycerol (18:1/18:2)     |
| <b>Lipid</b>  | Diacylglycerol                               | 1-palmitoyl-3-linoleoyl-glycerol (16:0/18:2)* |
| <b>Lipid</b>  | Endocannabinoid                              | linoleoyl ethanolamide                        |
| <b>Lipid</b>  | Endocannabinoid                              | oleoyl ethanolamide                           |
| <b>Lipid</b>  | Endocannabinoid                              | palmitoyl ethanolamide                        |
| <b>Lipid</b>  | Endocannabinoid                              | stearoyl ethanolamide                         |
| <b>Lipid</b>  | Fatty Acid Metabolism (also BCAA Metabolism) | propionylglycine (C3)                         |
| <b>Lipid</b>  | Fatty Acid Synthesis                         | malonate                                      |
| <b>Lipid</b>  | Fatty Acid, Amide                            | linoleamide (18:2n6)                          |
| <b>Lipid</b>  | Fatty Acid, Branched                         | 13-methylmyristate                            |
| <b>Lipid</b>  | Fatty Acid, Branched                         | 17-methylstearate                             |
| <b>Lipid</b>  | Fatty Acid, Branched                         | methylpalmitate (15 or 2)                     |
| <b>Lipid</b>  | Fatty Acid, Branched                         | pristanate                                    |
| <b>Lipid</b>  | Fatty Acid, Dicarboxylate                    | 1,11-undecanedicarboxylate                    |
| <b>Lipid</b>  | Fatty Acid, Dicarboxylate                    | 2-hydroxyglutarate                            |
| <b>Lipid</b>  | Fatty Acid, Dicarboxylate                    | 3-carboxyadipate                              |
| <b>Lipid</b>  | Fatty Acid, Dicarboxylate                    | 3-methyladipate                               |
| <b>Lipid</b>  | Fatty Acid, Dicarboxylate                    | 3-methylglutarate/2-methylglutarate           |
| <b>Lipid</b>  | Fatty Acid, Dicarboxylate                    | adipate                                       |
| <b>Lipid</b>  | Fatty Acid, Dicarboxylate                    | azelate (nonanedioate; C9)                    |
| <b>Lipid</b>  | Fatty Acid, Dicarboxylate                    | dimethylmalonic acid                          |
| <b>Lipid</b>  | Fatty Acid, Dicarboxylate                    | dodecanedioate (C12)                          |
| <b>Lipid</b>  | Fatty Acid, Dicarboxylate                    | hexadecanedioate (C16)                        |
| <b>Lipid</b>  | Fatty Acid, Dicarboxylate                    | maleate                                       |
| <b>Lipid</b>  | Fatty Acid, Dicarboxylate                    | octadecanedioate (C18)                        |
| <b>Lipid</b>  | Fatty Acid, Dicarboxylate                    | sebacate (decanedioate)                       |
| <b>Lipid</b>  | Fatty Acid, Dicarboxylate                    | suberate (octanedioate)                       |
| <b>Lipid</b>  | Fatty Acid, Dicarboxylate                    | undecanedioate                                |
| <b>Lipid</b>  | Fatty Acid, Dihydroxy                        | 12,13-DiHOME                                  |
| <b>Lipid</b>  | Fatty Acid, Dihydroxy                        | 9,10-DiHOME                                   |
| <b>Lipid</b>  | Fatty Acid, Monohydroxy                      | 10-hydroxystearate                            |
| <b>Lipid</b>  | Fatty Acid, Monohydroxy                      | 13-HODE + 9-HODE                              |
| <b>Lipid</b>  | Fatty Acid, Monohydroxy                      | 2-hydroxydecanoate                            |
| <b>Lipid</b>  | Fatty Acid, Monohydroxy                      | 2-hydroxypalmitate                            |
| <b>Lipid</b>  | Fatty Acid, Monohydroxy                      | 3-hydroxymyristate                            |
| <b>Lipid</b>  | Fatty Acid, Monohydroxy                      | 3-hydroxystearate                             |
| <b>Lipid</b>  | Fatty Acid, Monohydroxy                      | 5-hydroxyhexanoate                            |
| <b>Lipid</b>  | Glycerolipid Metabolism                      | glycerol                                      |
| <b>Lipid</b>  | Glycerolipid Metabolism                      | glycerol 3-phosphate                          |
| <b>Lipid</b>  | Glycerolipid Metabolism                      | glycerophosphoglycerol                        |

|              |                                        |                                         |
|--------------|----------------------------------------|-----------------------------------------|
| <b>Lipid</b> | Inositol Metabolism                    | myo-inositol                            |
| <b>Lipid</b> | Ketone Bodies                          | 3-hydroxybutyrate (BHBA)                |
| <b>Lipid</b> | Long Chain Fatty Acid                  | 10-heptadecenoate (17:1n7)              |
| <b>Lipid</b> | Long Chain Fatty Acid                  | arachidate (20:0)                       |
| <b>Lipid</b> | Long Chain Fatty Acid                  | eicosenoate (20:1n9 or 1n11)            |
| <b>Lipid</b> | Long Chain Fatty Acid                  | erucate (22:1n9)                        |
| <b>Lipid</b> | Long Chain Fatty Acid                  | margarate (17:0)                        |
| <b>Lipid</b> | Long Chain Fatty Acid                  | myristate (14:0)                        |
| <b>Lipid</b> | Long Chain Fatty Acid                  | myristoleate (14:1n5)                   |
| <b>Lipid</b> | Long Chain Fatty Acid                  | nonadecanoate (19:0)                    |
| <b>Lipid</b> | Long Chain Fatty Acid                  | oleate/vaccenate (18:1)                 |
| <b>Lipid</b> | Long Chain Fatty Acid                  | palmitate (16:0)                        |
| <b>Lipid</b> | Long Chain Fatty Acid                  | palmitoleate (16:1n7)                   |
| <b>Lipid</b> | Long Chain Fatty Acid                  | stearate (18:0)                         |
| <b>Lipid</b> | Lysolipid                              | 1-palmitoyl-GPC (16:0)                  |
| <b>Lipid</b> | Lysolipid                              | 1-palmitoyl-GPE (16:0)                  |
| <b>Lipid</b> | Lysolipid                              | 1-palmitoyl-GPG (16:0)*                 |
| <b>Lipid</b> | Lysolipid                              | 1-stearoyl-GPC (18:0)                   |
| <b>Lipid</b> | Lysolipid                              | 1-stearoyl-GPE (18:0)                   |
| <b>Lipid</b> | Lysoplasmalogen                        | 1-(1-enyl-stearoyl)-GPE (P-18:0)*       |
| <b>Lipid</b> | Medium Chain Fatty Acid                | 5-dodecenoate (12:1n7)                  |
| <b>Lipid</b> | Medium Chain Fatty Acid                | caprate (10:0)                          |
| <b>Lipid</b> | Medium Chain Fatty Acid                | caproate (6:0)                          |
| <b>Lipid</b> | Medium Chain Fatty Acid                | caprylate (8:0)                         |
| <b>Lipid</b> | Medium Chain Fatty Acid                | heptanoate (7:0)                        |
| <b>Lipid</b> | Medium Chain Fatty Acid                | laurate (12:0)                          |
| <b>Lipid</b> | Mevalonate Metabolism                  | 3-hydroxy-3-methylglutarate             |
| <b>Lipid</b> | Mevalonate Metabolism                  | mevalonate                              |
| <b>Lipid</b> | Monoacylglycerol                       | 1-linoleoylglycerol (18:2)              |
| <b>Lipid</b> | Monoacylglycerol                       | 1-palmitoylglycerol (16:0)              |
| <b>Lipid</b> | Phospholipid Metabolism                | 1-oleoyl-2-linoleoyl-GPC (18:1/18:2)*   |
| <b>Lipid</b> | Phospholipid Metabolism                | 1-palmitoyl-2-linoleoyl-GPC (16:0/18:2) |
| <b>Lipid</b> | Phospholipid Metabolism                | 1-palmitoyl-2-oleoyl-GPC (16:0/18:1)    |
| <b>Lipid</b> | Phospholipid Metabolism                | choline                                 |
| <b>Lipid</b> | Phospholipid Metabolism                | glycerophosphoethanolamine              |
| <b>Lipid</b> | Phospholipid Metabolism                | glycerophosphoinositol*                 |
| <b>Lipid</b> | Phospholipid Metabolism                | phosphocholine                          |
| <b>Lipid</b> | Phospholipid Metabolism                | trimethylamine N-oxide                  |
| <b>Lipid</b> | Polyunsaturated Fatty Acid (n3 and n6) | arachidonate (20:4n6)                   |
| <b>Lipid</b> | Polyunsaturated Fatty Acid (n3 and n6) | dihomolinoleate (20:2n6)                |
| <b>Lipid</b> | Polyunsaturated Fatty Acid (n3 and n6) | dihomolinolenate (20:3n3 or 3n6)        |
| <b>Lipid</b> | Polyunsaturated Fatty Acid (n3 and n6) | docosadienoate (22:2n6)                 |
| <b>Lipid</b> | Polyunsaturated Fatty Acid (n3 and n6) | docosahexaenoate (DHA; 22:6n3)          |
| <b>Lipid</b> | Polyunsaturated Fatty Acid (n3 and n6) | docosapentaenoate (DPA; 22:5n3)         |
| <b>Lipid</b> | Polyunsaturated Fatty Acid (n3 and n6) | eicosapentaenoate (EPA; 20:5n3)         |

|                   |                                                      |                                      |
|-------------------|------------------------------------------------------|--------------------------------------|
| <b>Lipid</b>      | Polyunsaturated Fatty Acid (n3 and n6)               | linoleate (18:2n6)                   |
| <b>Lipid</b>      | Polyunsaturated Fatty Acid (n3 and n6)               | linolenate (18:3n3 or 3n6)           |
| <b>Lipid</b>      | Primary Bile Acid Metabolism                         | cholate                              |
| <b>Lipid</b>      | Primary Bile Acid Metabolism                         | glycochenodeoxycholate               |
| <b>Lipid</b>      | Primary Bile Acid Metabolism                         | glycocholate                         |
| <b>Lipid</b>      | Secondary Bile Acid Metabolism                       | 3b-hydroxy-5-cholenoic acid          |
| <b>Lipid</b>      | Secondary Bile Acid Metabolism                       | 6-oxolithocholate                    |
| <b>Lipid</b>      | Secondary Bile Acid Metabolism                       | dehydrolithocholate                  |
| <b>Lipid</b>      | Secondary Bile Acid Metabolism                       | deoxycholate                         |
| <b>Lipid</b>      | Secondary Bile Acid Metabolism                       | glycodeoxycholate                    |
| <b>Lipid</b>      | Secondary Bile Acid Metabolism                       | glycolithocholate sulfate*           |
| <b>Lipid</b>      | Secondary Bile Acid Metabolism                       | hyocholate                           |
| <b>Lipid</b>      | Secondary Bile Acid Metabolism                       | lithocholate                         |
| <b>Lipid</b>      | Short Chain Fatty Acid                               | valerate (5:0)                       |
| <b>Lipid</b>      | Sphingolipid Metabolism                              | 3-ketosphinganine                    |
| <b>Lipid</b>      | Sphingolipid Metabolism                              | N-palmitoyl-sphinganine (d18:0/16:0) |
| <b>Lipid</b>      | Sphingolipid Metabolism                              | N-palmitoyl-sphingosine (d18:1/16:0) |
| <b>Lipid</b>      | Sphingolipid Metabolism                              | palmitoyl sphingomyelin (d18:1/16:0) |
| <b>Lipid</b>      | Sphingolipid Metabolism                              | phytosphingosine                     |
| <b>Lipid</b>      | Sphingolipid Metabolism                              | sphinganine                          |
| <b>Lipid</b>      | Sphingolipid Metabolism                              | sphingosine                          |
| <b>Lipid</b>      | Sterol                                               | 4-cholesten-3-one                    |
| <b>Lipid</b>      | Sterol                                               | beta-sitosterol                      |
| <b>Lipid</b>      | Sterol                                               | campesterol                          |
| <b>Lipid</b>      | Sterol                                               | cholesterol                          |
| <b>Lipid</b>      | Sterol                                               | coprostanol                          |
| <b>Lipid</b>      | Sterol                                               | lanosterol                           |
| <b>Nucleotide</b> | Purine and Pyrimidine Metabolism                     | methylphosphate                      |
| <b>Nucleotide</b> | Purine Metabolism, (Hypo)Xanthine/Inosine containing | 2'-deoxyinosine                      |
| <b>Nucleotide</b> | Purine Metabolism, (Hypo)Xanthine/Inosine containing | hypoxanthine                         |
| <b>Nucleotide</b> | Purine Metabolism, (Hypo)Xanthine/Inosine containing | inosine                              |
| <b>Nucleotide</b> | Purine Metabolism, (Hypo)Xanthine/Inosine containing | urate                                |
| <b>Nucleotide</b> | Purine Metabolism, (Hypo)Xanthine/Inosine containing | xanthine                             |
| <b>Nucleotide</b> | Purine Metabolism, Adenine containing                | 1-methyladenine                      |
| <b>Nucleotide</b> | Purine Metabolism, Adenine containing                | 2'-deoxyadenosine                    |
| <b>Nucleotide</b> | Purine Metabolism, Adenine containing                | adenine                              |
| <b>Nucleotide</b> | Purine Metabolism, Adenine containing                | adenosine                            |
| <b>Nucleotide</b> | Purine Metabolism, Adenine containing                | N6-dimethylallyladenine              |
| <b>Nucleotide</b> | Purine Metabolism, Guanine containing                | 2'-deoxyguanosine                    |
| <b>Nucleotide</b> | Purine Metabolism, Guanine containing                | 7-methylguanine                      |
| <b>Nucleotide</b> | Purine Metabolism, Guanine containing                | 8-hydroxyguanine                     |
| <b>Nucleotide</b> | Purine Metabolism, Guanine containing                | guanine                              |
| <b>Nucleotide</b> | Purine Metabolism, Guanine containing                | guanosine                            |

|                    |                                            |                                 |
|--------------------|--------------------------------------------|---------------------------------|
| <b>Nucleotide</b>  | Pyrimidine Metabolism, Cytidine containing | 2'-deoxycytidine                |
| <b>Nucleotide</b>  | Pyrimidine Metabolism, Cytidine containing | cytidine                        |
| <b>Nucleotide</b>  | Pyrimidine Metabolism, Cytidine containing | cytosine                        |
| <b>Nucleotide</b>  | Pyrimidine Metabolism, Orotate containing  | dihydroorotate                  |
| <b>Nucleotide</b>  | Pyrimidine Metabolism, Orotate containing  | N-carbamoylaspartate            |
| <b>Nucleotide</b>  | Pyrimidine Metabolism, Orotate containing  | orotate                         |
| <b>Nucleotide</b>  | Pyrimidine Metabolism, Thymine containing  | thymidine                       |
| <b>Nucleotide</b>  | Pyrimidine Metabolism, Thymine containing  | thymine                         |
| <b>Nucleotide</b>  | Pyrimidine Metabolism, Uracil containing   | 2'-deoxyuridine                 |
| <b>Nucleotide</b>  | Pyrimidine Metabolism, Uracil containing   | 3-ureidopropionate              |
| <b>Nucleotide</b>  | Pyrimidine Metabolism, Uracil containing   | 4-ureidobutyrate                |
| <b>Nucleotide</b>  | Pyrimidine Metabolism, Uracil containing   | 5-methyluridine (ribothymidine) |
| <b>Nucleotide</b>  | Pyrimidine Metabolism, Uracil containing   | beta-alanine                    |
| <b>Nucleotide</b>  | Pyrimidine Metabolism, Uracil containing   | pseudouridine                   |
| <b>Nucleotide</b>  | Pyrimidine Metabolism, Uracil containing   | uracil                          |
| <b>Nucleotide</b>  | Pyrimidine Metabolism, Uracil containing   | uridine                         |
| <b>Peptide</b>     | Dipeptide                                  | alanylleucine                   |
| <b>Peptide</b>     | Dipeptide                                  | glycylisoleucine                |
| <b>Peptide</b>     | Dipeptide                                  | glycylleucine                   |
| <b>Peptide</b>     | Dipeptide                                  | glycylvaline                    |
| <b>Peptide</b>     | Dipeptide                                  | isoleucylglycine                |
| <b>Peptide</b>     | Dipeptide                                  | leucylalanine                   |
| <b>Peptide</b>     | Dipeptide                                  | leucylglutamine*                |
| <b>Peptide</b>     | Dipeptide                                  | leucylglycine                   |
| <b>Peptide</b>     | Dipeptide                                  | phenylalanylalanine             |
| <b>Peptide</b>     | Dipeptide                                  | phenylalanylglycine             |
| <b>Peptide</b>     | Dipeptide                                  | threonylphenylalanine           |
| <b>Peptide</b>     | Dipeptide                                  | tryptophylglycine               |
| <b>Peptide</b>     | Dipeptide                                  | valylglutamine                  |
| <b>Peptide</b>     | Dipeptide                                  | valylglycine                    |
| <b>Peptide</b>     | Dipeptide                                  | valylleucine                    |
| <b>Peptide</b>     | Dipeptide Derivative                       | anserine                        |
| <b>Peptide</b>     | Gamma-glutamyl Amino Acid                  | gamma-glutamylalanine           |
| <b>Peptide</b>     | Gamma-glutamyl Amino Acid                  | gamma-glutamyl-epsilon-lysine   |
| <b>Peptide</b>     | Gamma-glutamyl Amino Acid                  | gamma-glutamylglutamate         |
| <b>Peptide</b>     | Gamma-glutamyl Amino Acid                  | gamma-glutamylglycine           |
| <b>Peptide</b>     | Gamma-glutamyl Amino Acid                  | gamma-glutamylisoleucine*       |
| <b>Peptide</b>     | Gamma-glutamyl Amino Acid                  | gamma-glutamylleucine           |
| <b>Peptide</b>     | Gamma-glutamyl Amino Acid                  | gamma-glutamylmethionine        |
| <b>Peptide</b>     | Gamma-glutamyl Amino Acid                  | gamma-glutamylphenylalanine     |
| <b>Peptide</b>     | Gamma-glutamyl Amino Acid                  | gamma-glutamyltyrosine          |
| <b>Xenobiotics</b> | Benzoate Metabolism                        | 2,4,6-trihydroxybenzoate        |
| <b>Xenobiotics</b> | Benzoate Metabolism                        | 3,4-dihydroxybenzoate           |
| <b>Xenobiotics</b> | Benzoate Metabolism                        | benzoate                        |
| <b>Xenobiotics</b> | Chemical                                   | 1,3-propanediol                 |
| <b>Xenobiotics</b> | Chemical                                   | 2-oxo-1-pyrrolidinepropionate   |

|                    |                      |                                           |
|--------------------|----------------------|-------------------------------------------|
| <b>Xenobiotics</b> | Chemical             | 3-hydroxypyridine                         |
| <b>Xenobiotics</b> | Chemical             | diethanolamine                            |
| <b>Xenobiotics</b> | Chemical             | diglycerol                                |
| <b>Xenobiotics</b> | Chemical             | ectoine                                   |
| <b>Xenobiotics</b> | Chemical             | N-methylpipercolate                       |
| <b>Xenobiotics</b> | Chemical             | N-propionylmethionine                     |
| <b>Xenobiotics</b> | Chemical             | succinimide                               |
| <b>Xenobiotics</b> | Chemical             | sulfate*                                  |
| <b>Xenobiotics</b> | Drug                 | N-carbamylglutamate                       |
| <b>Xenobiotics</b> | Food Component/Plant | 1-methyl-beta-carboline-3-carboxylic acid |
| <b>Xenobiotics</b> | Food Component/Plant | 2,3-dihydroxyisovalerate                  |
| <b>Xenobiotics</b> | Food Component/Plant | 2-isopropylmalate                         |
| <b>Xenobiotics</b> | Food Component/Plant | 2-keto-3-deoxy-gluconate                  |
| <b>Xenobiotics</b> | Food Component/Plant | 2-oxindole-3-acetate                      |
| <b>Xenobiotics</b> | Food Component/Plant | 2-piperidinone                            |
| <b>Xenobiotics</b> | Food Component/Plant | beta-guanidinopropanoate                  |
| <b>Xenobiotics</b> | Food Component/Plant | caffeate                                  |
| <b>Xenobiotics</b> | Food Component/Plant | diaminopimelate                           |
| <b>Xenobiotics</b> | Food Component/Plant | dihydroferulic acid                       |
| <b>Xenobiotics</b> | Food Component/Plant | dipicolinate                              |
| <b>Xenobiotics</b> | Food Component/Plant | enterolactone                             |
| <b>Xenobiotics</b> | Food Component/Plant | erythrose                                 |
| <b>Xenobiotics</b> | Food Component/Plant | ferulate                                  |
| <b>Xenobiotics</b> | Food Component/Plant | galacturonate                             |
| <b>Xenobiotics</b> | Food Component/Plant | gluconate                                 |
| <b>Xenobiotics</b> | Food Component/Plant | indolin-2-one                             |
| <b>Xenobiotics</b> | Food Component/Plant | levulinate (4-oxovalerate)                |
| <b>Xenobiotics</b> | Food Component/Plant | nicotianamine                             |
| <b>Xenobiotics</b> | Food Component/Plant | pheophorbide A                            |
| <b>Xenobiotics</b> | Food Component/Plant | phytanate                                 |
| <b>Xenobiotics</b> | Food Component/Plant | piperidine                                |
| <b>Xenobiotics</b> | Food Component/Plant | piperine                                  |
| <b>Xenobiotics</b> | Food Component/Plant | pyrraline                                 |
| <b>Xenobiotics</b> | Food Component/Plant | quinat                                    |
| <b>Xenobiotics</b> | Food Component/Plant | sitostanol                                |
| <b>Xenobiotics</b> | Food Component/Plant | solanidine                                |
| <b>Xenobiotics</b> | Food Component/Plant | stachydrine                               |
| <b>Xenobiotics</b> | Food Component/Plant | tyrosol                                   |
| <b>Xenobiotics</b> | Xanthine Metabolism  | 1,3,7-trimethylurate                      |
| <b>Xenobiotics</b> | Xanthine Metabolism  | 1,3-dimethylurate                         |
| <b>Xenobiotics</b> | Xanthine Metabolism  | 1,7-dimethylurate                         |
| <b>Xenobiotics</b> | Xanthine Metabolism  | 3,7-dimethylurate                         |
| <b>Xenobiotics</b> | Xanthine Metabolism  | 5-acetylamino-6-amino-3-methyluracil      |
| <b>Xenobiotics</b> | Xanthine Metabolism  | caffeine                                  |
| <b>Xenobiotics</b> | Xanthine Metabolism  | paraxanthine                              |

**Xenobiotics**

Xanthine Metabolism

theophylline
